# Supplementary material for: Dissolving microneedles based on ZnO nanoparticles and an ionic liquid as synergistic antibacterial agents
Source: Royal Society of Chemistry journal article supplement (doi:10.1039/d3tb00127j), 2023-01-01
Supplement: d3tb00127j1.pdf [file d3tb00127j1.pdf]

Table S1. Effect of ultrasonic conditions with different amounts of water and time on particle sizes of ZnO NPs (— means there is precipitation).

| <b>Time</b><br><b>Water</b> | 3 min        | 5 min        | 10 min       |
|-----------------------------|--------------|--------------|--------------|
| 1000 mL                     | —            | 420.3/0.373  | 559.83/0.317 |
| 2000 mL                     | 589.13/0.383 | 537.06/0.247 | —            |
| 3000 mL                     | 633.5/0.339  | 752.2/0.426  | —            |
